# Supplementary figures and images for: Seasonal and Regional Differences in Extreme Rainfall Events and Their Contribution to the World’s Precipitation: GPM Observations
Source: Hindawi journal article supplement (doi:10.1155/2019/4631609), 2019-05-30

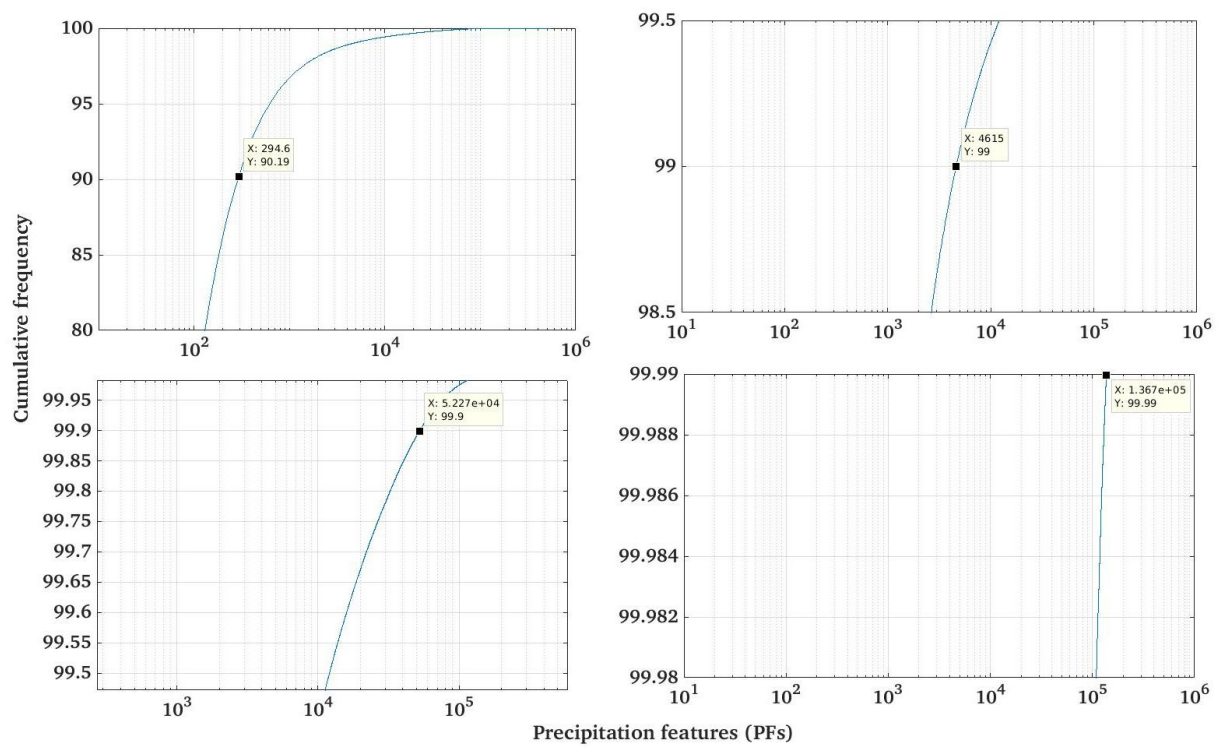

Supplementary Figure 1. Figure shows the selection of largest PFs based on the area

Supplement: f1 [file 4631609.f1.pdf]
